# Supplementary material for: The versatile characteristics of Ars/SGaInS van der Waals heterostructures
Source: Royal Society of Chemistry journal article supplement (doi:10.1039/d2cp04832a), 2023-01-01
Supplement: d2cp04832a1.pdf [file d2cp04832a1.pdf]

Supplementary information

**The versatile characteristics of Ars/SGaInS van der Waals  
heterostructures**

Iqtidar Ahmad<sup>a</sup>, Anwar Ali<sup>b</sup>, Ismail Shahid<sup>c</sup>, Rawaid Ali<sup>a</sup>, Wei Xiong<sup>a</sup>, Lei Gao<sup>d,\*</sup>, Jinming Cai<sup>a,\*</sup>

<sup>a</sup> Faculty of Materials Science and Engineering, Kunming University of Science and Technology, Kunming 650093, Yunnan, P. R. China. E-mail: j.cai@kust.edu.cn

<sup>b</sup> School of Microelectronics, Northwestern Polytechnical University, Xi'an 710072, Shaanxi, P. R. China.

<sup>c</sup> School of Materials Science and Engineering, Computational Centre for Molecular Science, Institute of New Energy Material Chemistry, Nankai University, Tianjin 300350, P. R. China.

<sup>d</sup> Faculty of Science, Kunming University of Science and Technology, Kunming 650093, Yunnan, P. R. China.  
E-mail: lgao@kust.edu.cn

---

\*Corresponding author.

E-mail: j.cai@kust.edu.cn (Jinming Cai); lgao@kust.edu.cn (Lei Gao)

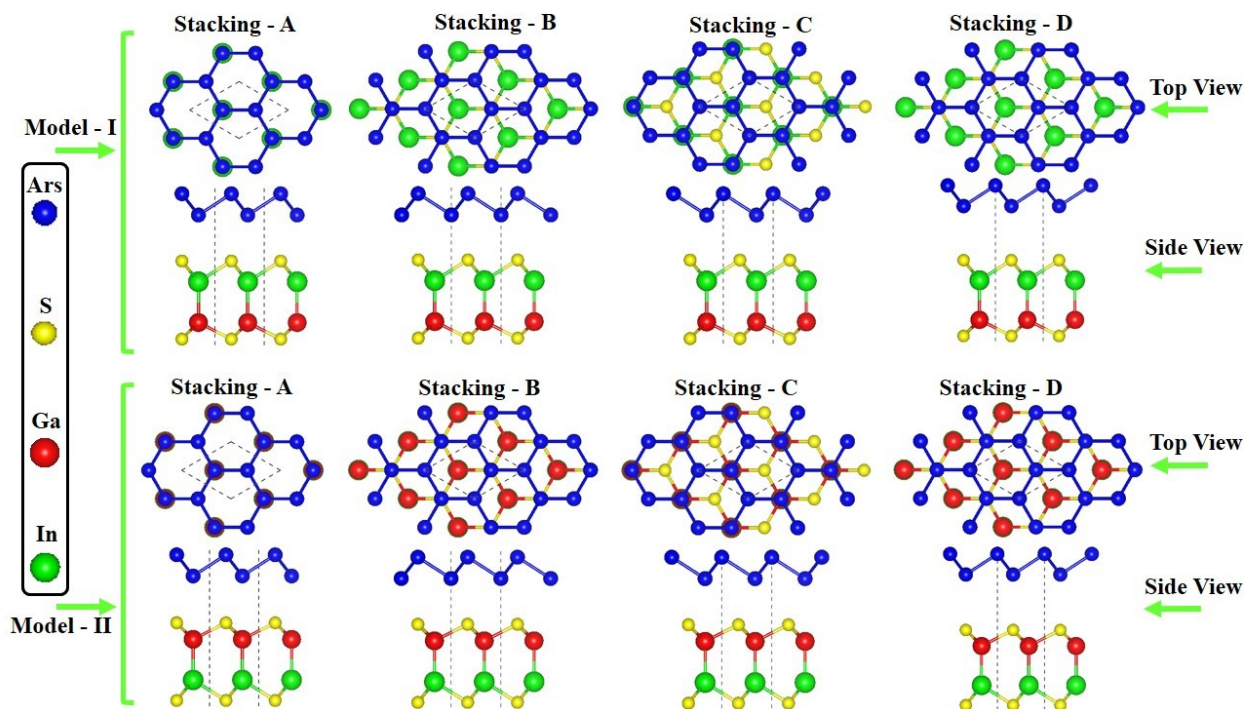

Fig. S1 An optimized top and side view of the Model-I and Model-II Ars/SGaInS vdWHs with four possible stackings (A, B, C, D).

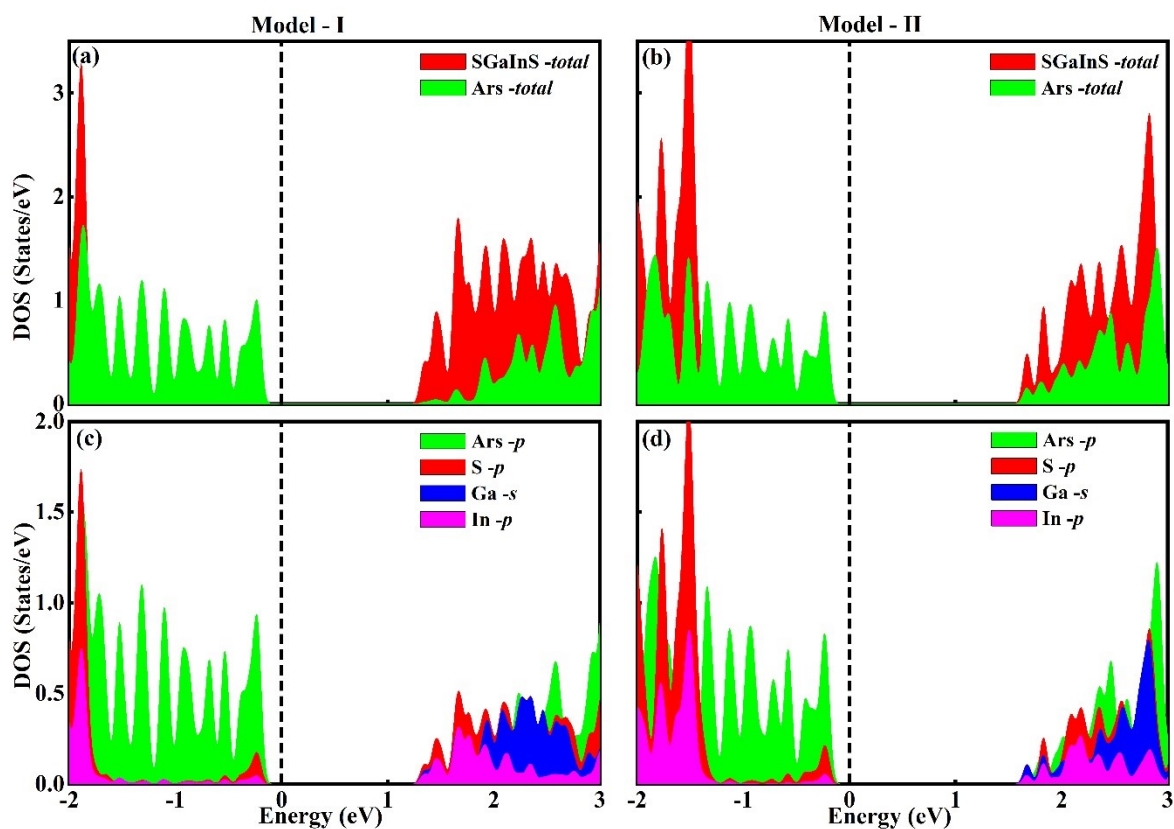

Fig. S2 Density of states of Ars/SGaInS Model-I (left column) and Model-II (right column).

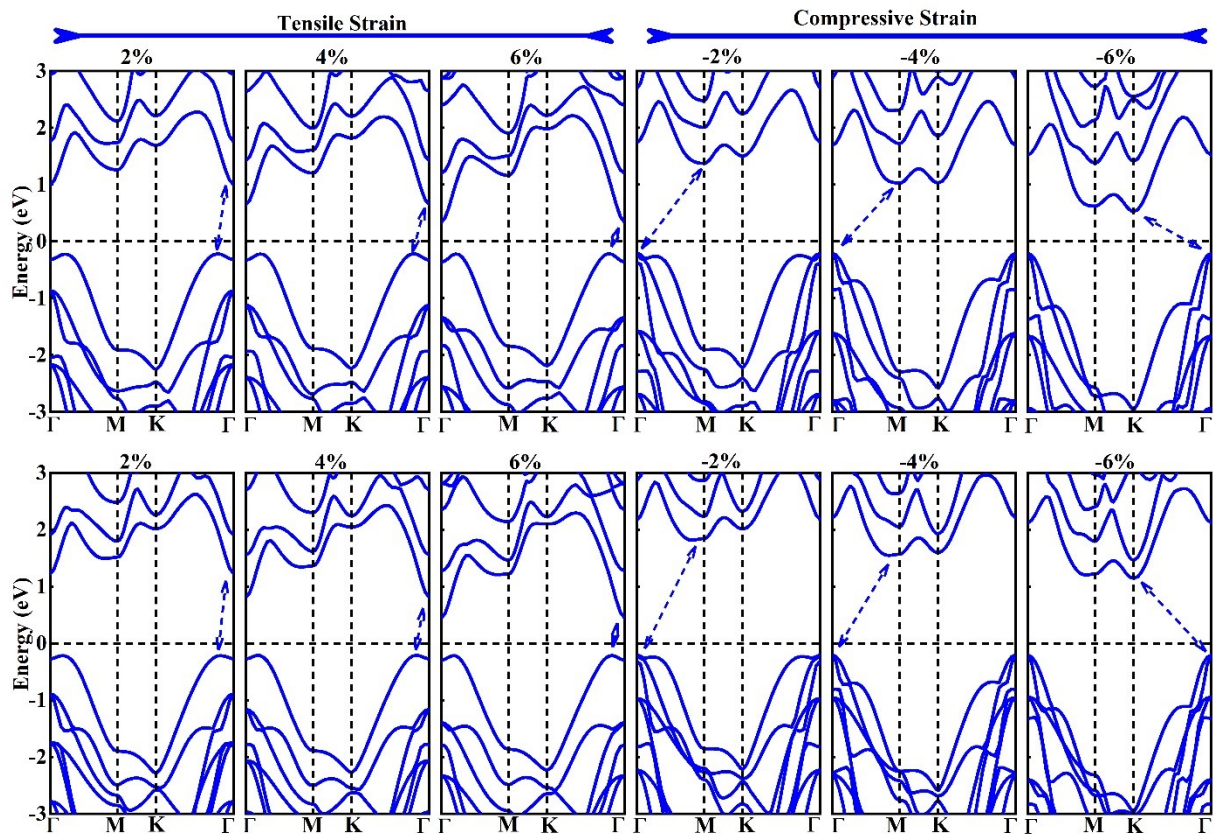

Fig. S3 Electronic band structures under tensile (2%, 4%, 6%) strain and compressive (-2%, -4%, -6%) strain of Model-I (upper panel) and Model-II (lower panel) Ars/SGaInS vdWHs.

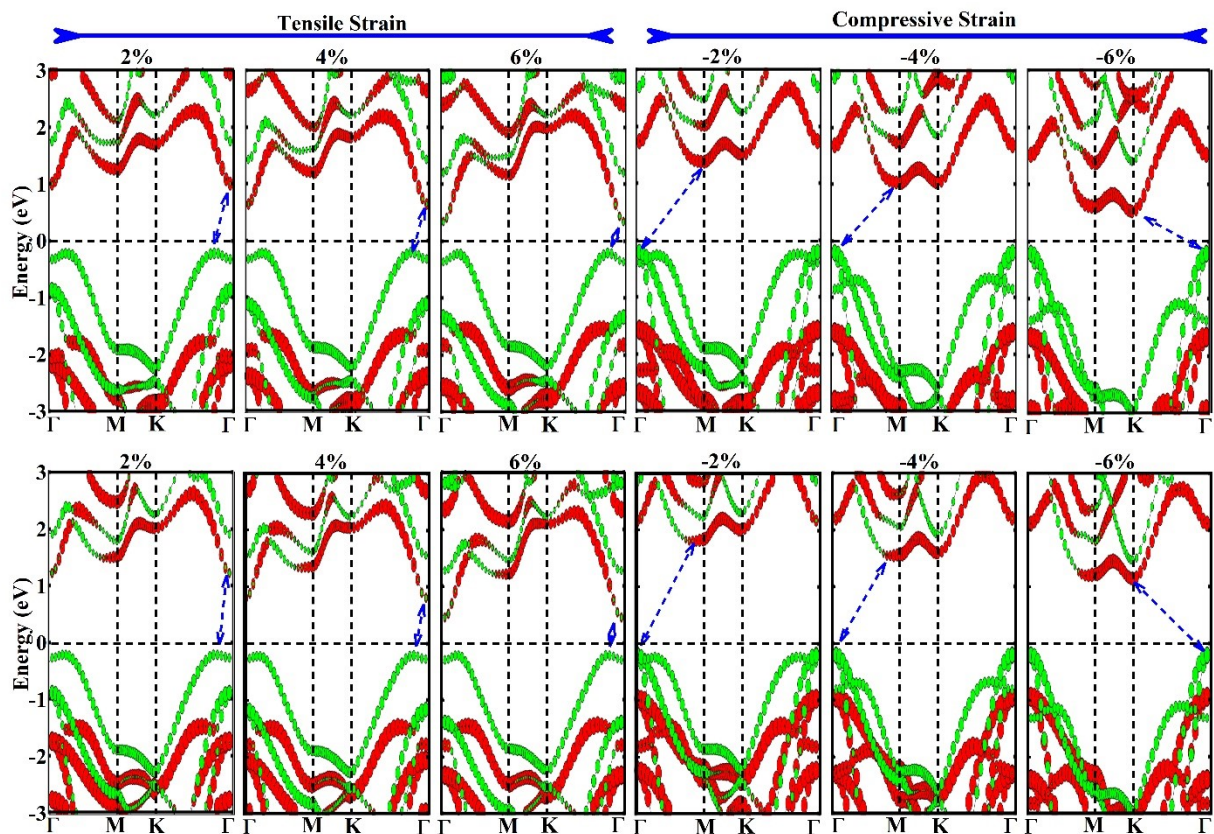

Fig. S4 Projected band structures under tensile (2%, 4%, 6%) strain and compressive (-2%, -4%, -6%) strain of Model-I (upper panel) and Model-II (lower panel) Ars/SGaInS vdWHs.

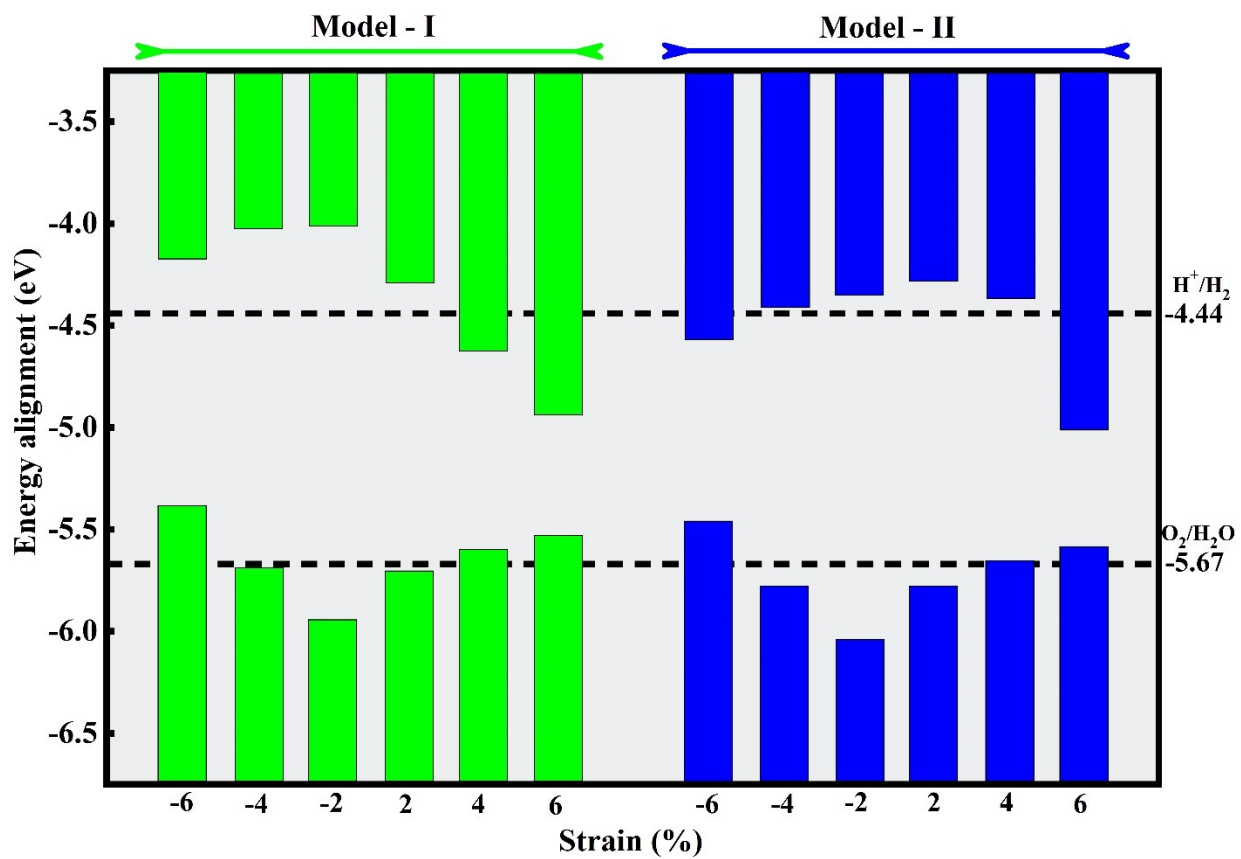

Fig. S5 The band edge positions variations under tensile (2%, 4%, 6%) strain and compressive (-2%, -4%, -6%) strain of Ars/SGaInS vdWHs Model-I and Model-II.



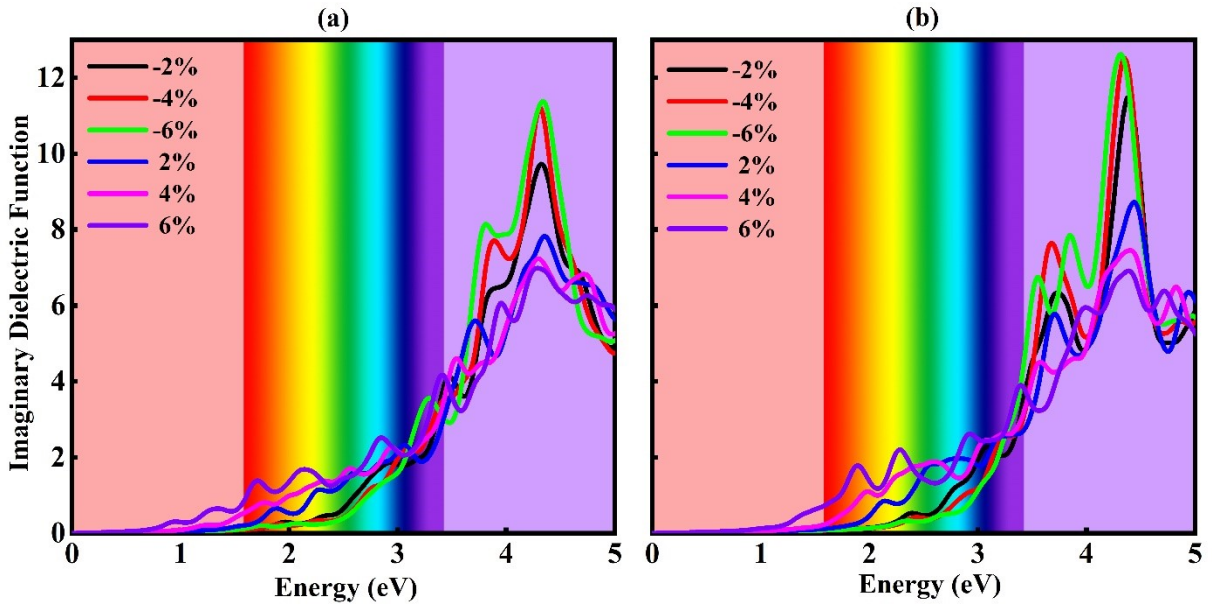

Fig. S6 The imaginary dielectric function under tensile (2%, 4%, 6%) strain and compressive (-2%, -4%, -6%) strain of Model-I (a) and Model-II (b).

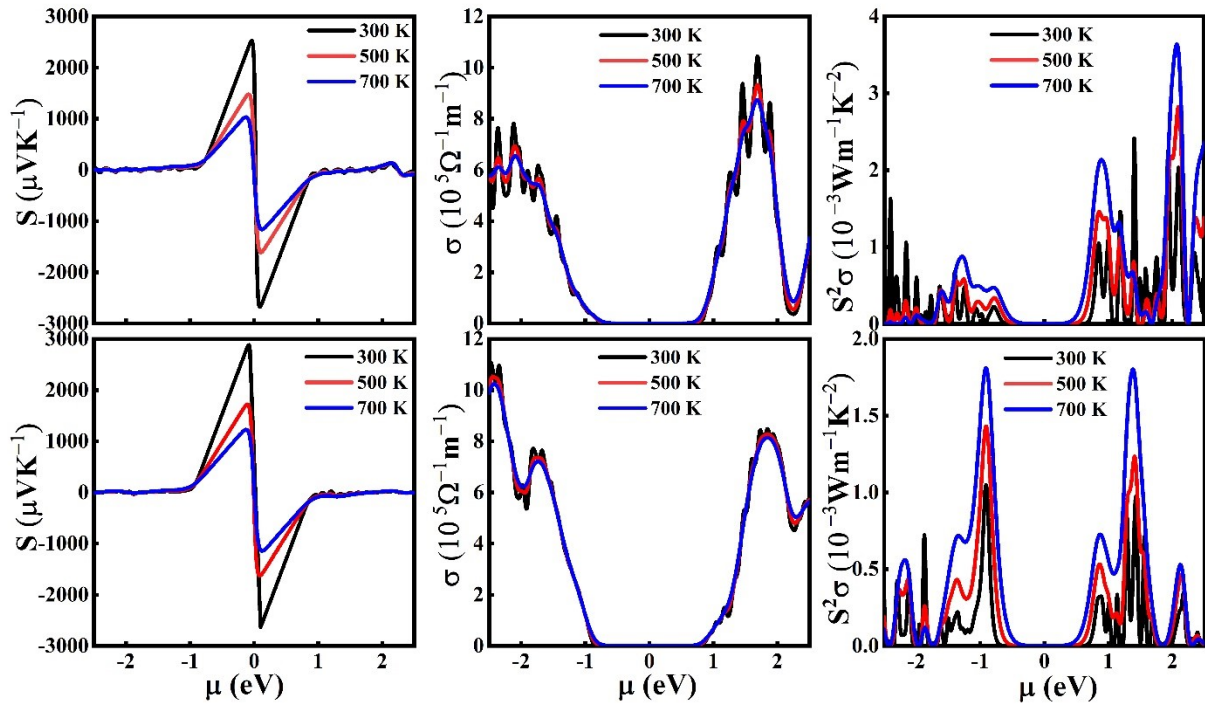

Fig. S7 The seebeck coefficient (a, b), electrical conductivity (c, d), and power factor (e, f) of Arsenic (upper row) and SGaInS (lower row) in relation to chemical potential.

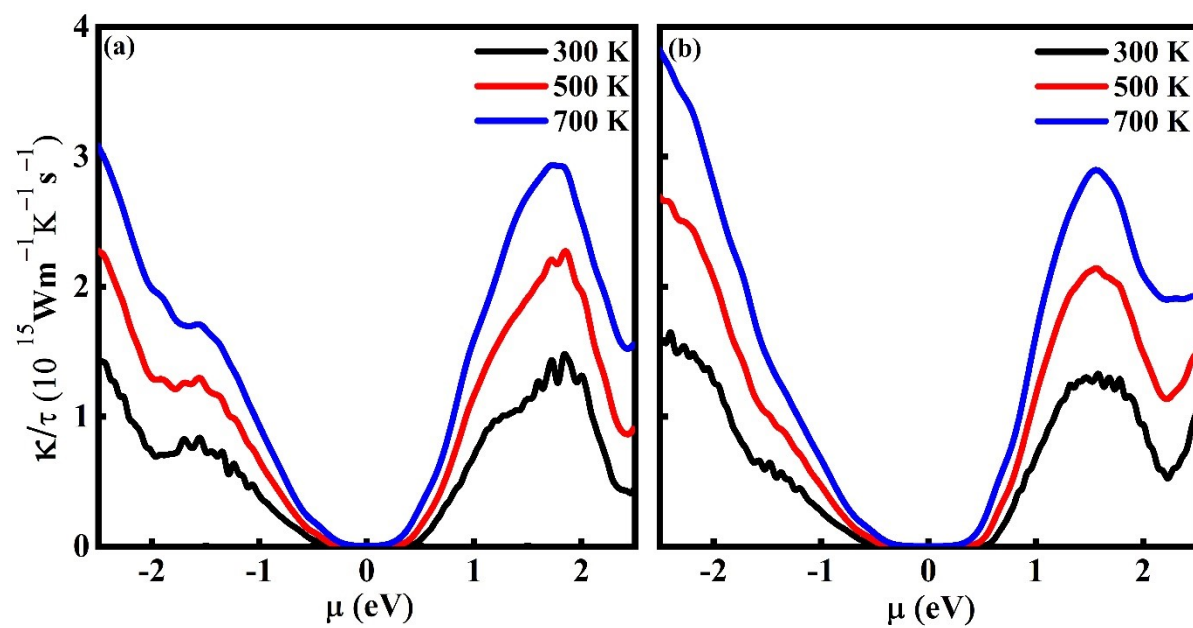

Fig. S8 Electronic thermal conductivity under 300K, 500K, and 700K temperature of Model-I (a) and Model-II (b) with respect to chemical potential.
